# Supplementary material for: Enhanced Cl2 sensing performance by decorating discrete Au nanoparticles on octahedral CdIn2O4 crystals
Source: Royal Society of Chemistry journal article supplement (doi:10.1039/c3ce26755e), 2013-01-01
Supplement: c3ce26755e.pdf [file c3ce26755e.pdf]

## Electronic Supplementary Information (ESI) for

Enhanced Cl<sub>2</sub> Sensing Performance by Decorating Discrete Au  
Nanoparticles on Octahedral CdIn<sub>2</sub>O<sub>4</sub> Crystals

*Yanli Liu<sup>a,b</sup>, Wei Wang<sup>a</sup>, Tianquan Lin<sup>c</sup>, Fuhui Liao<sup>a</sup>, Fuqiang Huang<sup>a,c,\*</sup>, Jianhua Lin<sup>a,\*</sup>*

<sup>a</sup> College of Chemistry and Molecular Engineering and College of Engineering, Peking University, Beijing 100871, China; <sup>b</sup> College of Material Science and Engineering, Hunan University, Changsha 410082, China; <sup>c</sup> Shanghai Institute of Ceramics, Chinese Academy of Sciences, Shanghai 200050, China

Corresponding author:

E-mail: huangfq@pku.edu.cn

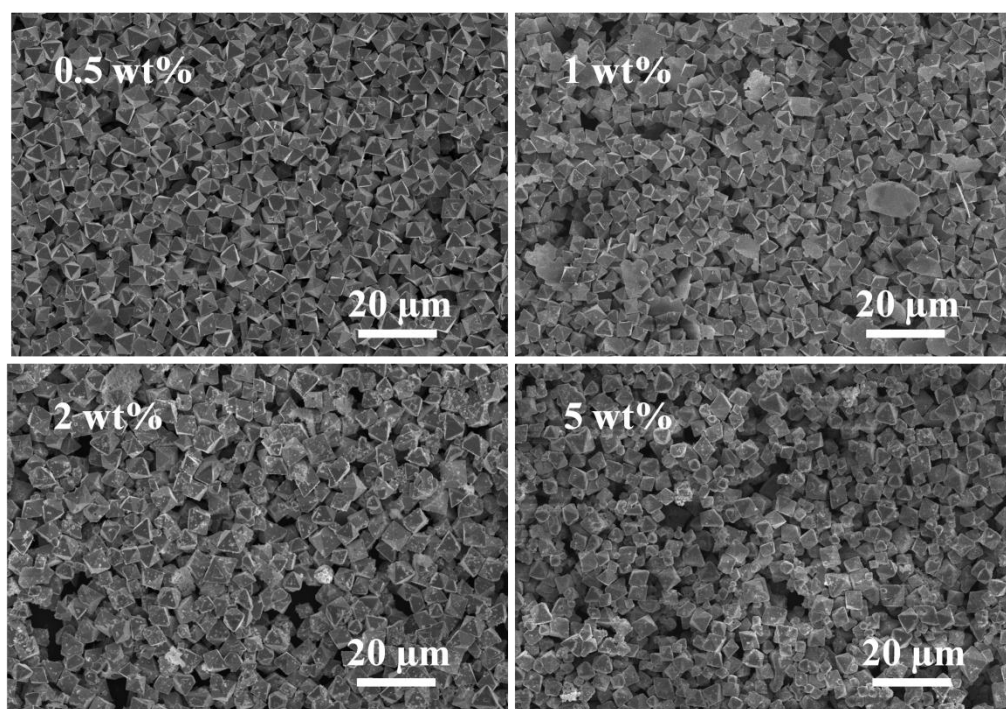

**Fig. S1** Low-magnification SEM images of the samples with different amount of Au NPs: (a) 0.5 wt.%, (b) 1 wt.%, (c) 2 wt.%, and (d) 5 wt.%.
